# Supplementary material
Source: PubMed Central journal article supplement (PMC1595432)

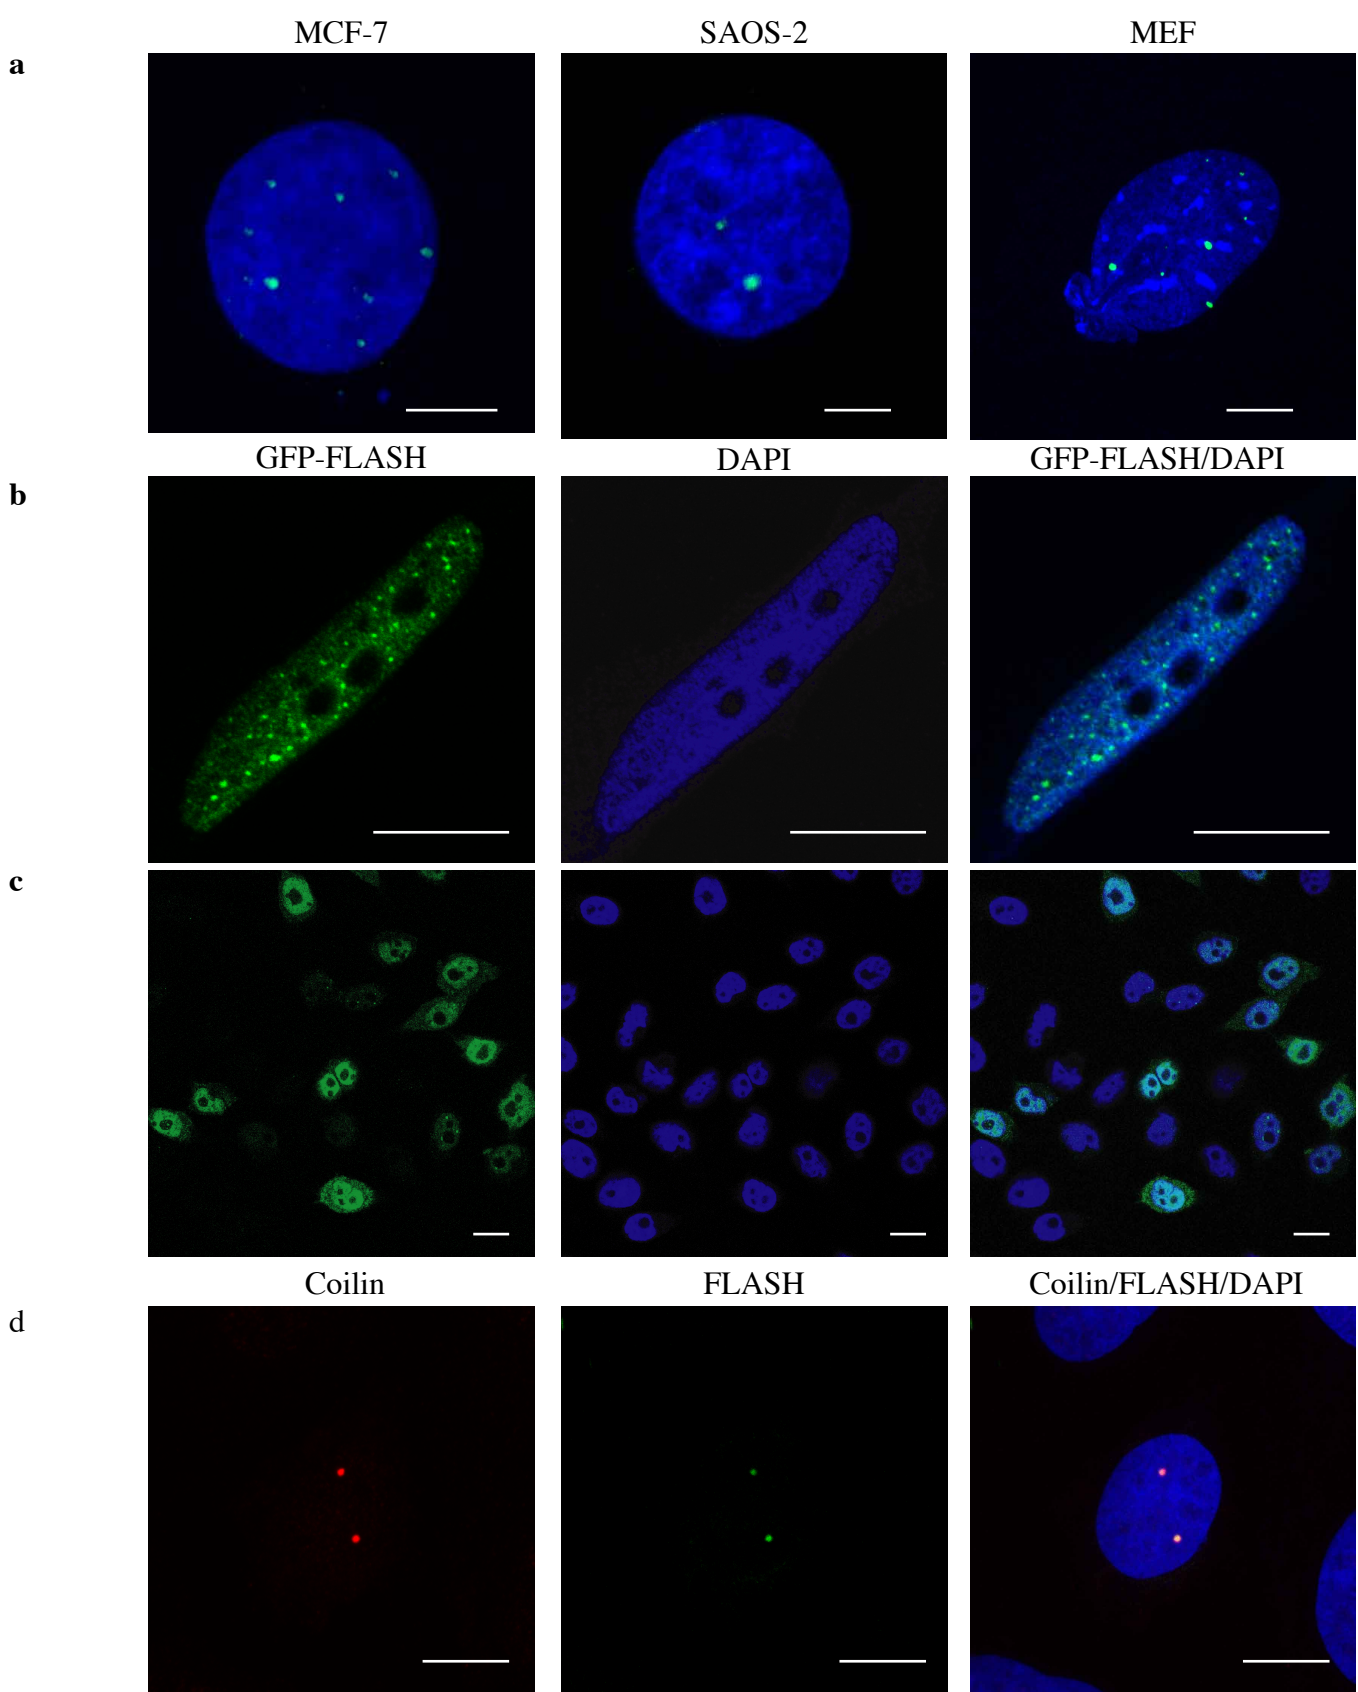

Supplement: pnas_0604225103_1.pdf [file pnas_0604225103_1.pdf]

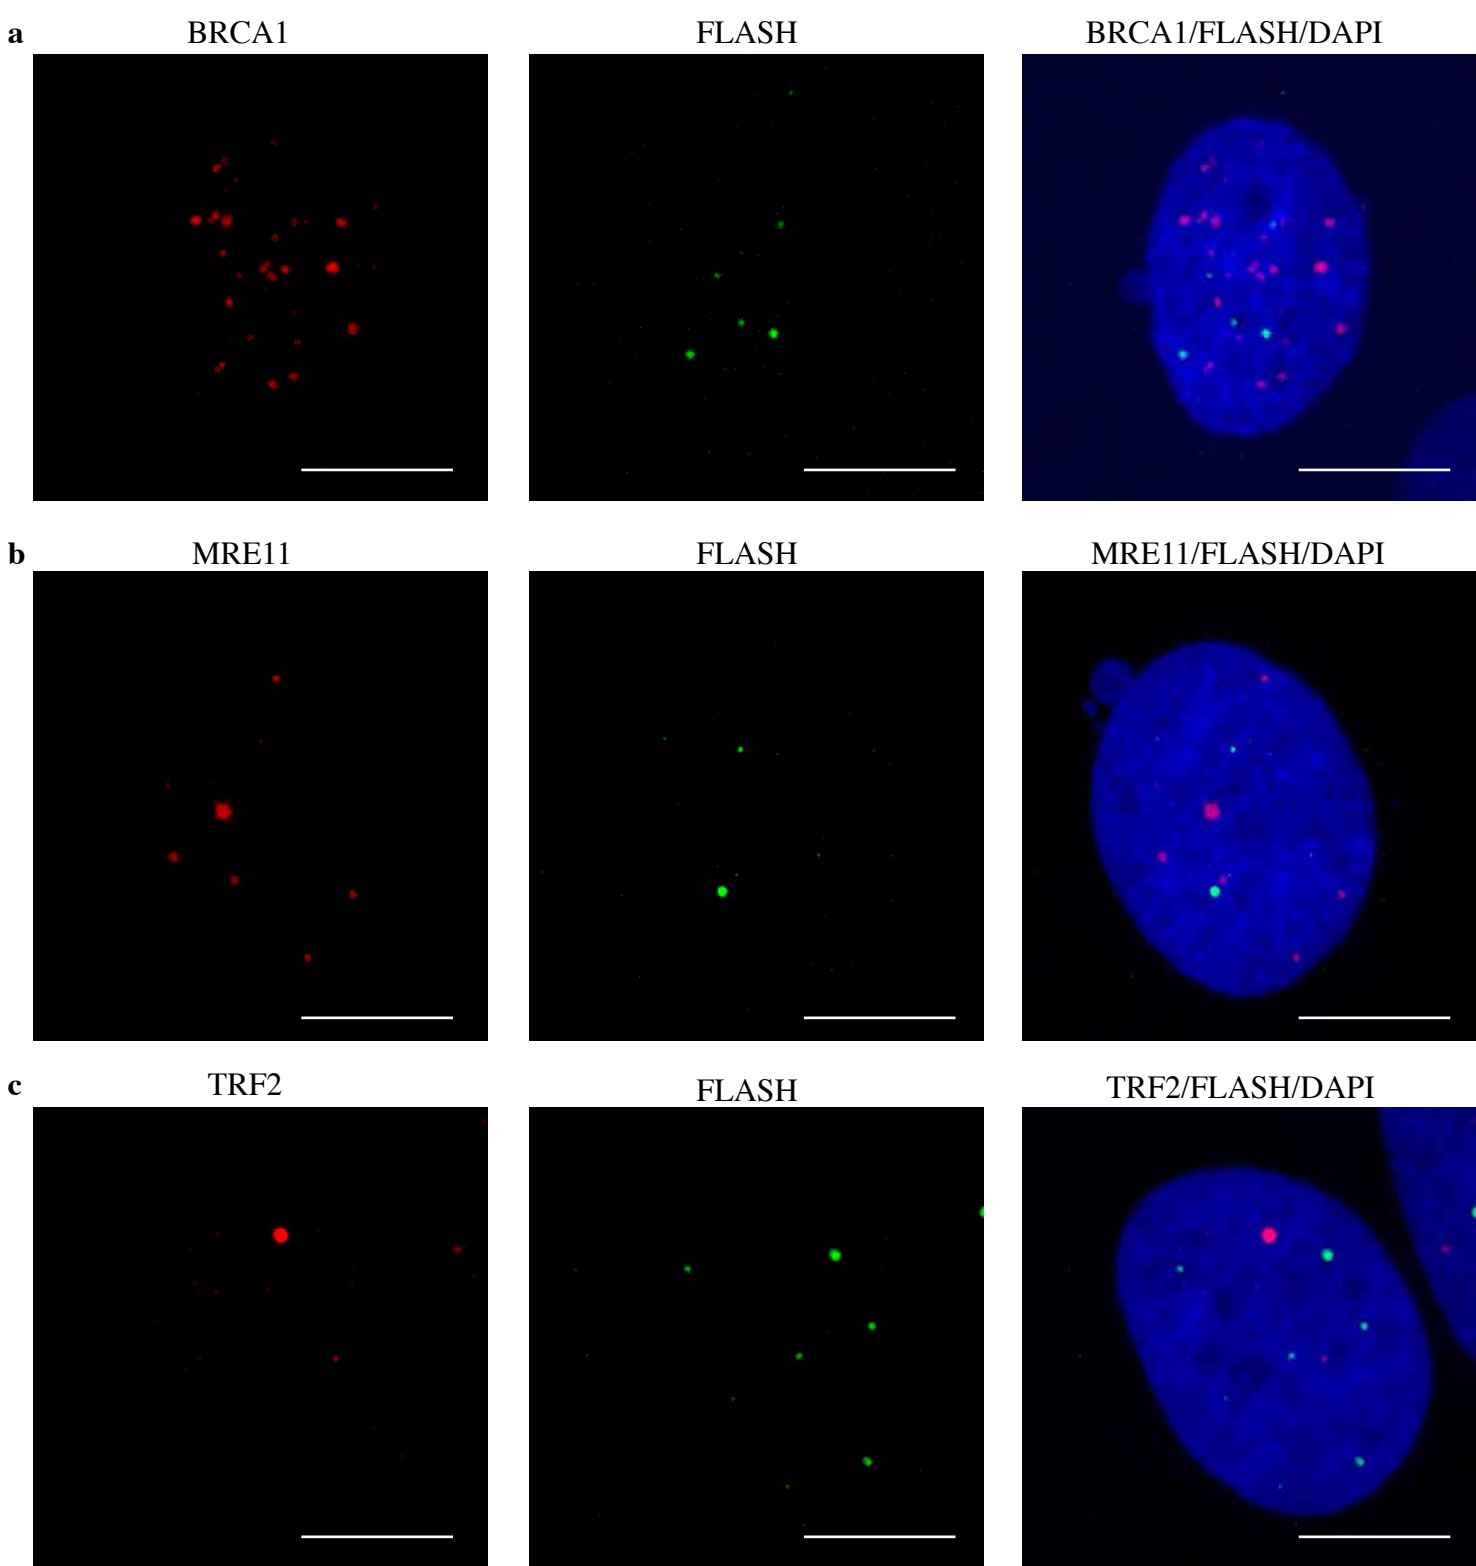

Supplement: pnas_0604225103_2.pdf [file pnas_0604225103_2.pdf]

**FLASH****PML****FLASH/PML/DAPI**

HeLa

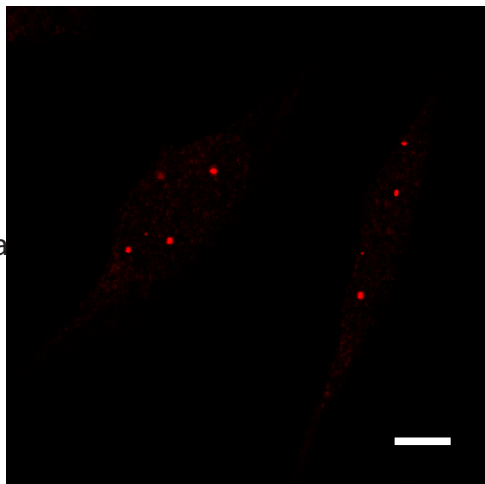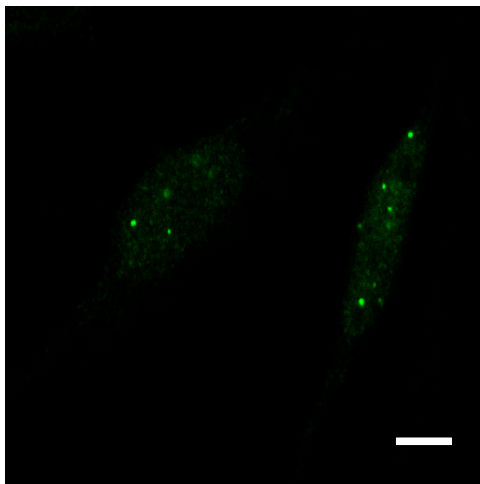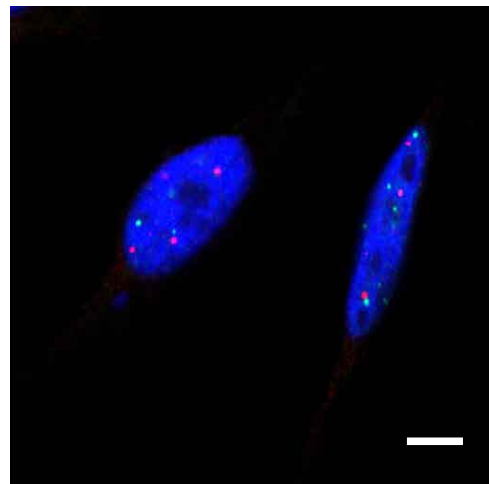

SAOS2

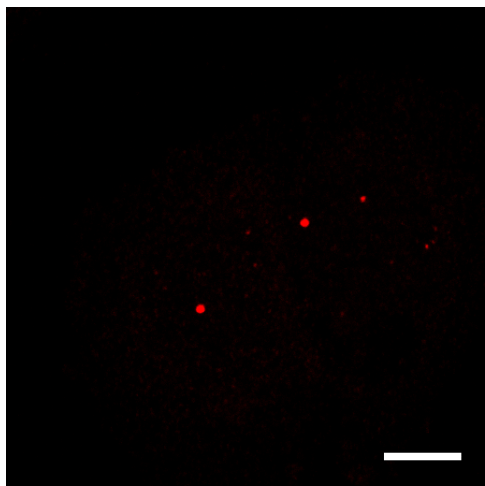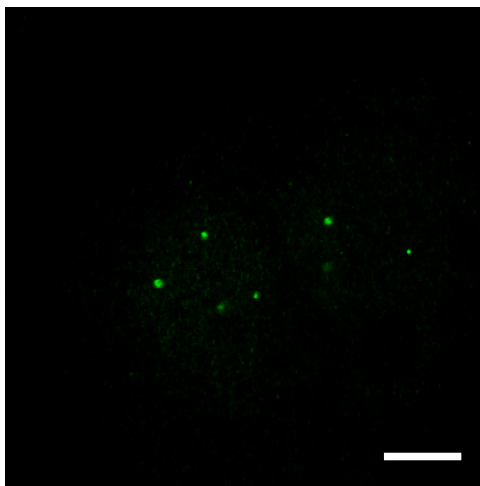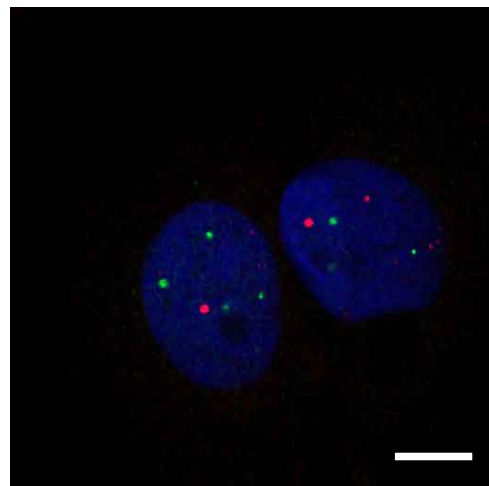

Supplement: pnas_0604225103_3.pdf [file pnas_0604225103_3.pdf]

**a**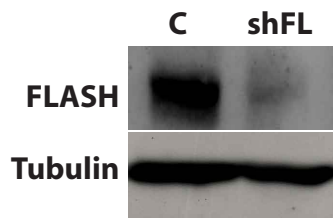**b**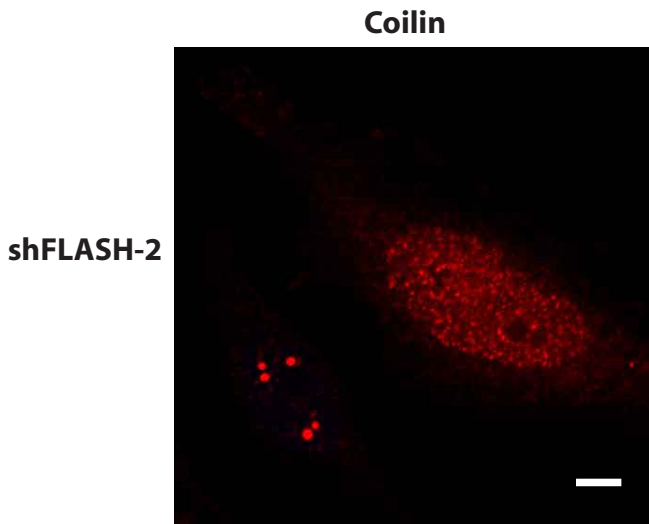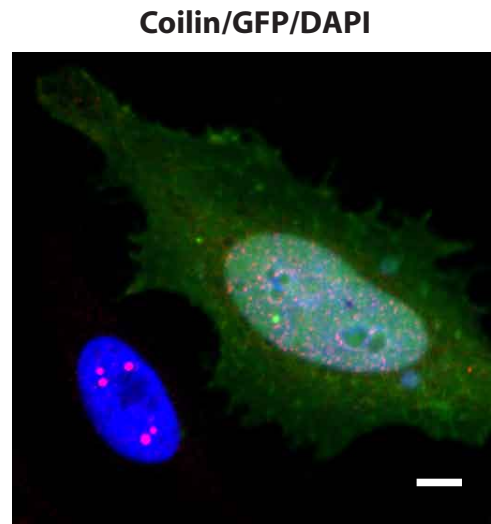**c**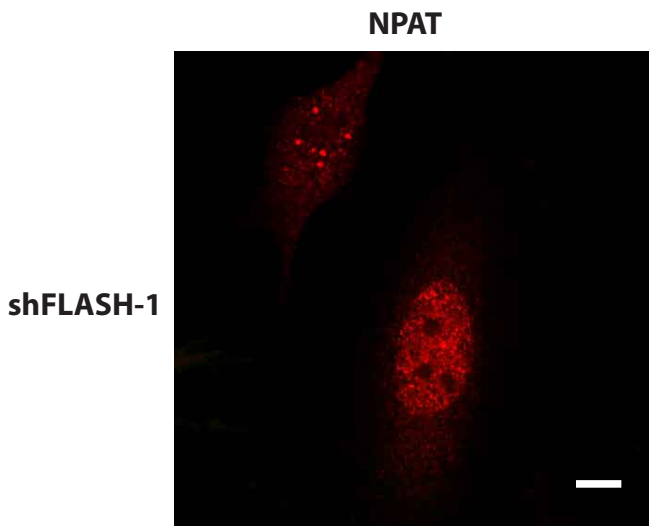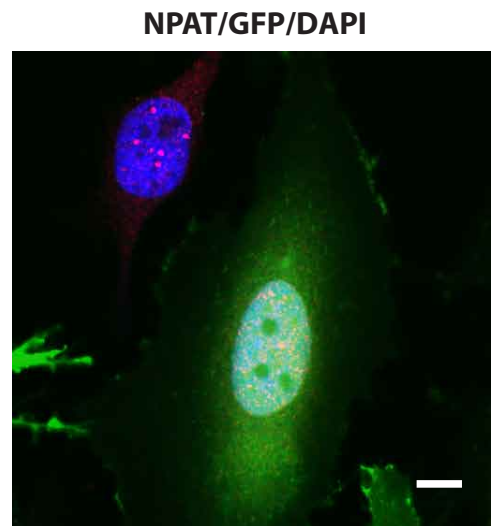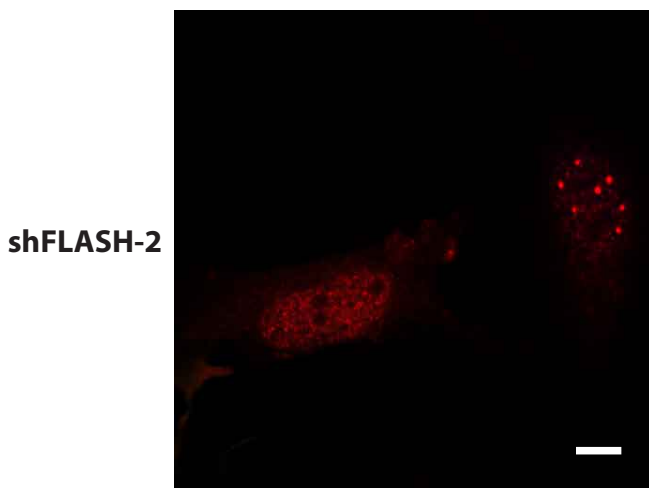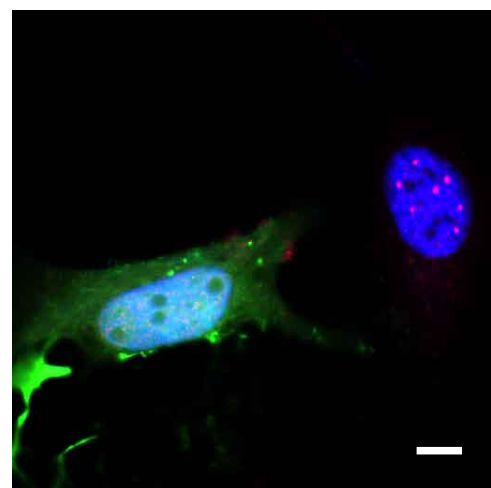

Supplement: pnas_0604225103_4.pdf [file pnas_0604225103_4.pdf]
